# Supplementary material
Source: PubMed Central journal article supplement (PMC3244523)
Supplement: NIHMS338937-supplement-1_si_001.pdf [file NIHMS338937-supplement-1_si_001.pdf]

# *Supporting Information*

*for*

## Potentiometric Sensors Based on Fluorous Membranes Doped with Highly Selective Ionophores for CO<sub>3</sub><sup>2-</sup>

*Li D Chen<sup>1</sup>, Debaprasad Mandal<sup>2</sup>, Gianluca Pozzi<sup>3</sup>, John A Gladysz<sup>2</sup>, Philippe Bühlmann<sup>\*1</sup>*

<sup>1</sup>Department of Chemistry, University of Minnesota, 207 Pleasant St. SE, Minneapolis MN 55455, USA, <sup>2</sup>Department of Chemistry, Texas A&M University, PO Box 30012, College Station, Texas 77842,

<sup>3</sup>CNR-Istituto di Scienze Tecnologie Molecolari, via Golgi 19, 20133, Milano, Italy.

Email Address: buhlmann@umn.edu

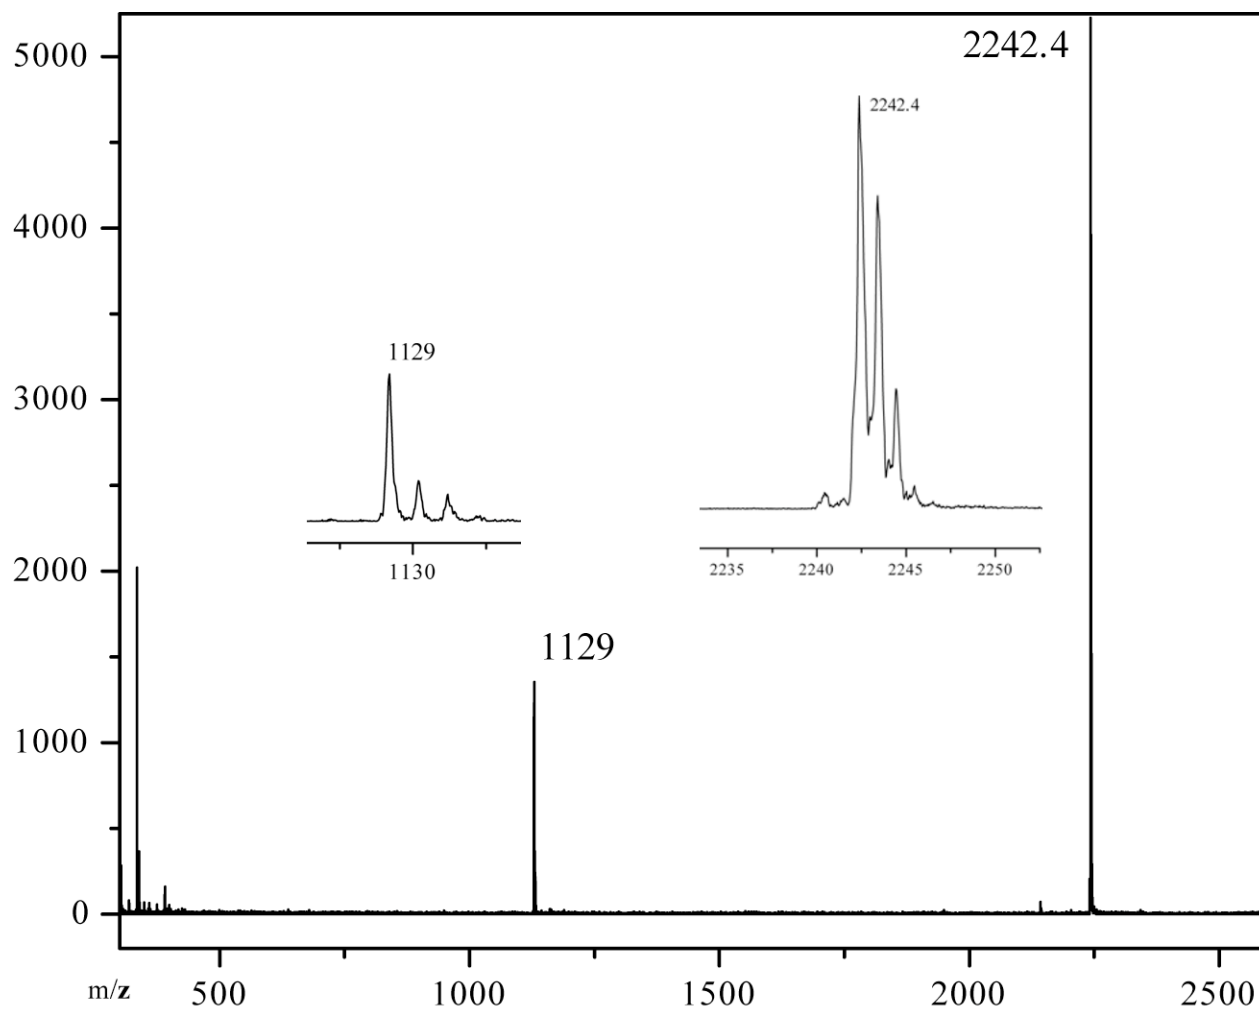

BP = 2242.4, 5225

**Figure S1.** MALDI-TOF mass spectrum of fluorophilic salt **1**.

**Table S1.** CO<sub>3</sub><sup>2-</sup> Selectivities ( $\log K_{co_3^{2-},J}^{pot}$ ) of Conventional Ionophore-Doped ISEs and Fluorous Ionophore-doped ISEs with Perfluoroperhydrophenanthrene as Membrane Matrix

| ion J                        | CO <sub>3</sub> <sup>2-</sup> Selectivities ( $\log K_{co_3^{2-},J}^{pot}$ ) |                                                 |                                                 |
|------------------------------|------------------------------------------------------------------------------|-------------------------------------------------|-------------------------------------------------|
|                              | Conventional ISE <sup>a</sup>                                                | Fluorous ISE No. 1 ( <b>Mn-1</b> ) <sup>b</sup> | Fluorous ISE No. 2 ( <b>Mn-2</b> ) <sup>c</sup> |
| Cl <sup>-</sup>              | -4.80                                                                        | -6.87 ± 0.26                                    | -5.46 ± 0.21                                    |
| Br <sup>-</sup>              | -3.50                                                                        | -4.97 ± 0.26                                    | -6.90 ± 0.22                                    |
| NO <sub>3</sub> <sup>-</sup> | -1.60                                                                        | -5.13 ± 0.17                                    | -6.58 ± 0.20                                    |
| SCN <sup>-</sup>             | 0.70                                                                         | -1.59 ± 0.16                                    | -2.78 ± 0.20                                    |
| Sal <sup>-</sup>             | 3.80                                                                         | -2.19 ± 0.27                                    | -2.36 ± 0.28                                    |

<sup>a</sup> Ionophore: heptyl 4-trifluoroacetylbenzoate<sup>1</sup>; <sup>b</sup> fluorophilic ionophore **Mn-1** (1.5 mM) and cationic sites, **1** (1.0 mM); <sup>c</sup> fluorophilic ionophore **Mn-2** (4.0 mM) and anionic sites, **2** (1.0 mM)

**Table S2.**  $\text{BPh}_4^+$  Selectivities ( $\log K_{\text{BPh}_5^-, J}^{\text{pot}}$ ) of Fluorous Ionophore-Free Ion-Exchanger Membranes and Fluorous Ionophore-Doped Membranes with Perfluoroperhydrophenanthrene as Membrane Matrix.

| Membrane Composition |                 | $\text{BPh}_4^+$ Selectivities ( $\log K_{\text{BPh}_5^-, J}^{\text{pot}}$ ) |                  |                   |
|----------------------|-----------------|------------------------------------------------------------------------------|------------------|-------------------|
| ionophore            | Ionic sites     | $\text{CO}_3^{2-}$                                                           | $\text{SCN}^-$   | $\text{OH}^-$     |
| none                 | <b>1</b> (2 mM) | $-9.90 \pm 0.10$                                                             | $-5.80 \pm 0.10$ | $-10.93 \pm 0.16$ |
| <b>Mn-1</b> (1.5 mM) | <b>1</b> (1 mM) | $-4.27 \pm 0.11$                                                             | $-5.07 \pm 0.05$ | $-3.74 \pm 0.08$  |
| <b>Mn-1</b> (1.5 mM) | <b>1</b> (2 mM) | $-8.65 \pm 0.16$                                                             | $-5.85 \pm 0.13$ | $-7.05 \pm 0.15$  |
| <b>Mn-1</b> (4.0 mM) | <b>2</b> (1 mM) | $-1.86 \pm 0.06$                                                             | $-0.22 \pm 0.08$ | $0.71 \pm 0.09$   |
| <b>Mn-2</b> (1.5 mM) | <b>1</b> (1 mM) | $-6.02 \pm 0.09$                                                             | $-5.79 \pm 0.05$ | $-4.07 \pm 0.05$  |
| <b>Mn-2</b> (1.5 mM) | <b>1</b> (2 mM) | $-7.08 \pm 0.15$                                                             | $-5.81 \pm 0.13$ | $-5.55 \pm 0.25$  |
| <b>Mn-2</b> (4.0 mM) | <b>2</b> (1 mM) | $-0.11 \pm 0.08$                                                             | $-1.50 \pm 0.05$ | $3.50 \pm 0.09$   |
| <b>Mn-3</b> (4.0 mM) | <b>2</b> (1 mM) | $2.39 \pm 0.05$                                                              | $-1.88 \pm 0.10$ | $0.75 \pm 0.10$   |

## Binding Constant Derivation

When determined with respect to a noncomplexing ion such as tetraphenylborate, the selectivity of an ionophore-based ISE membrane for an ion that forms a complex with the ionophore can be used to determine the binding constant of the ion–ionophore complex. The relevant theory has been reported in the literature.<sup>2-6</sup> Here, binding constants are derived considering a rather complicated case in which the ionophores can function as both positively and negatively charged ionophores.

According to the phase boundary potential model, the selectivity coefficient for an ionophore-free ion-exchanger membrane  $K_{JI}^{pot}(IE)$  is given by<sup>7</sup>

$$K_{JI}^{pot}(IE) = \frac{[J^-(J)]^z}{K_{JI}[I^{z-}(I)]} \quad (S1)$$

where  $I^{z-}$  is the anion of charge  $z$  that the ionophore can bind (in our case,  $\text{CO}_3^{2-}$ ), and  $J^-$  is the reference ion that we assume not to interact with the ionophore ( $\text{BPh}_4^-$ ).  $[I^{z-}(I)]$  and  $[J^-(J)]$  refer to free ion concentrations in the membrane phase when there is only one kind of the two anions,  $I^{z-}$  or  $J^-$ , present in the membrane, and  $K_{JI}$  is the equilibrium constant for the exchange of  $I^{z-}$  and  $J^-$  between the membrane and the sample phase. Since there is no ionophore in the membrane,  $[J^-(J)]$  equals  $R_T$ , the total concentration of ionic site in the ion exchanger membrane, while  $[I^{z-}(I)]$  equals  $R_T / z$ .

$$K_{JI}^{pot}(IE) = \frac{zR_T^z}{K_{JI}R_T} \quad (S2)$$

In the same way, we can get the selectivity coefficient of the equivalent membrane doped with positively charged ionophore, which is given by

$$K_{JI}^{pot}(L) = \frac{(L_{tot}^+ + z_R[R_T^{z_R}])^z}{K_{JI}[I^{z-}(I)]} \quad (S3)$$

where  $L_{tot}^+$  is the total concentration of ionophore and  $[R_T^{z_R}]$  is the total concentration of ionic sites with a charge sign of  $z_R$  in the membrane. Assuming that  $J^-$  does not bind to the ionophore,  $[J^-(J)]$  is equal

to  $L_{tot}^+ + z_R[R_T^{z_R}]$ . Combining equations S2 and S3 gives

$$[I^{z-}(I)] = \frac{(L_{tot}^+ + z_R[R_T^{z_R}])^z}{zR_T} \frac{K_{JI}^{pot}(IE)}{K_{JI}^{pot}(L)} \quad (S4)$$

Since more specific situations are of particular interest here,  $I^{2-}$  (representing  $CO_3^{2-}$ ) will be used for following discussion. Panel A in Figure 4 of the associated full paper shows that in the membrane with an anionic site-to-ionophore ratio of 1:4, the dominant complex is  $L_2^+I^{2-}$ . Thus, the cumulative binding constant,  $\beta_{IL_2}$ , is given by

$$\beta_{IL_2} = K_{L^+ - I^{z-}} K_{L^+ I^{z-} - L^+} = \frac{[L_2^+ I^{z-}]}{[L^+]^2 [I^{z-}]} \quad (S4)$$

where  $[L^+]$  is the concentration of free ionophore in the membrane.

Since there is a large excess of  $L^+$  in an ideally selective membrane, the concentration of 1:1 stoichiometry complex of ionophore and the anion,  $L^+I^{2-}$ , resulting from dissociation of  $L_2^+I^{2-}$ , is very low. Thus, we can assume that  $[L^+I^{2-}]$  is  $\approx 0$  M. From the mass and charge balance in the membrane,  $[L_2^+I^{2-}]$  and  $[L^+]$  can be expressed by

$$[L_2^+I^{2-}] = [L_{tot}^+] - [R_T^-] - 2[I^{2-}] \quad (S5)$$

and

$$[L^+] = 2[I^{2-}] + [R_T^-] \quad (S6)$$

Combining equations S4, S7, and S8 gives

$$\beta_{IL_2} = \frac{[L_{tot}^+] - [R_T^-] - 2[I^{2-}]}{(2[I^{2-}] + [R_T^-])^2 [I^{2-}]} \quad (S7)$$

Substituting  $[I^{2-}]$  as calculated from Equation S4 into Equation S7, the binding constant  $\beta_{IL_2}$  is obtained.

In the ionophore-based membranes with a cationic site-to-ionophore ratio of 2:3, complexes of the

type  $L_2^+I^{2-}$  and  $L^+I^{2-}$  coexist. Using  $\beta_{IL_2}$  and the mass and charge balance in the membrane to solve for  $[L^+]$  gives

$$[L^+] = \frac{-2 + \sqrt{4 - 4\beta_{IL_2}[I^{2-}]( [R_T^+] - [L_{tot}^+] - 2[I^{2-}] )}}{2\beta_{IL_2}[I^{2-}]} \quad (S8)$$

Expressions for  $[L_2^+I^{2-}]$  and  $[L^+I^{2-}]$  can now be obtained by insert of  $[I^{2+}]$  from equation S4 and  $[L^+]$  from equation S8 into the following two equations:

$$[L_2^+I^{2-}] = [L_{tot}^+] - [R_T^+] + 2[I^{2-}] - 2[L^+] \quad (S9)$$

$$[L^+I^{2-}] = [L^+] - [R_T^+] - 2[I^{2-}] \quad (S10)$$

Note that the resulting expressions for  $[L_2^+I^{2-}]$  and  $[L^+I^{2-}]$  are very lengthy, and are therefore not reproduced here. The same applies for several other expressions shown in the following.

With expressions for  $[L^+]$ ,  $[I^{2+}]$ ,  $[L^+I^{2-}]$  and  $[L_2^+I^{2-}]$  known,  $K_{L^+-I^{2-}}$  and  $K_{L^+I^{2-}-L^+}$  can be calculated from

$$K_{L^+-I^{2-}} = \frac{[L^+I^{2-}]}{[L^+][I^{2-}]} \quad (S11)$$

and

$$K_{L^+I^{2-}-L^+} = \frac{[L_2^+I^{2-}]}{[L^+][L^+I^{2-}]} \quad (S12)$$

Complexes of the type  $L^+I_2^{2-}$  (i.e., one ionophore bound to two  $CO_3^{2-}$ ) are formed in the membranes with 4:3 cationic site-to-ionophore ratio. The binding constant,  $K_{L^+I_2^{2-}-I^{2-}}$ , is given by

$$K_{L^+I_2^{2-}-I^{2-}} = \frac{[L^+I_2^{2-}]}{[I^{2-}][L^+I^{2-}]} \quad (S13)$$

In membranes with this ionic site-to-ionophore ratio (see panel A, Figure 4, of the associated full paper),  $[L^+I_2^{2-}]$  and  $[L^+I^{2-}]$  are the dominant species and one may assume that  $[L^+]$  is equal to  $\approx 0$  M. Therefore,

the mass balance and charge balance in the membrane can be used to give  $[L^+I_2^{2-}]$  as

$$[L^+I_2^{2-}] = \frac{[R_r^+] - [L_{tot}^+] - 2[I^{2-}]}{2} \quad (\text{S14})$$

and  $[L^+I^{2-}]$  is given by

$$[L^+I^{2-}] = \frac{3[L_{tot}^+] - [R_r^+] + 2[I^{2-}]}{2} \quad (\text{S15})$$

Substituting equations S4, S14 and S15 into equation S13 gives the binding constant  $K_{L^+I^{2-}-I^{2-}}$ .



The mechanism of the super-Nernstian responses exhibited by the membranes with a 1:4 ratio of anionic sites and ionophore was further confirmed by the fact that at low pH, these electrodes exhibited nearly Nernstian responses of about 50 mV/decade for  $\text{SCN}^-$  at high concentrations from  $10^{-1}$  to  $10^{-3}$  (where a majority of the ionophore forms  $[\text{LSCN}]^-$  complexes) and slopes of -87 mV/decade and -71 mV/decade for **Mn-1** and **Mn-2** for  $\text{SCN}^-$  concentrations in the range from  $10^{-3.5}$  to  $10^{-4.5}$  M (where the ionophore forms 1:2 and 1:1 or  $[\text{L}_n(\text{OH})_{n-1}]^+$  complexes and no free ionophore is left in the membranes).

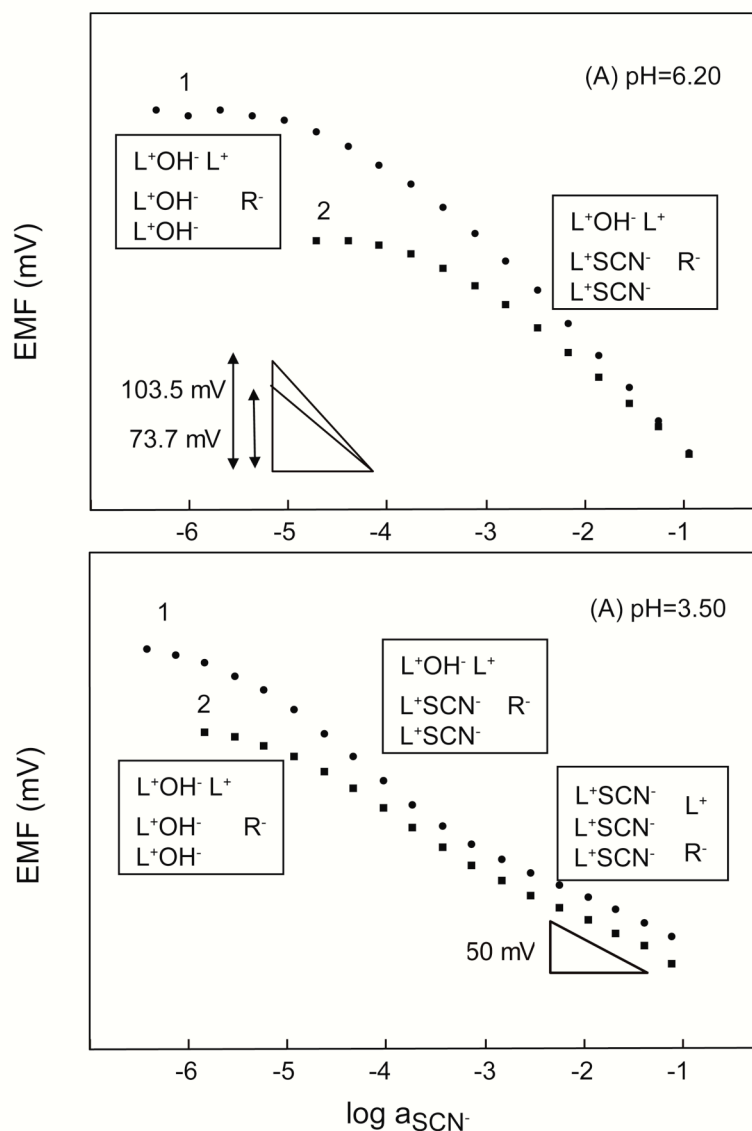

**Figure S2.** Potentiometric  $\text{SCN}^-$  response of an ISE based on a liquid membrane with perfluoroperhydrophenanthrene doped with: (1) 4.0 mM ionophore **Mn-1** and 1.0 mM anionic sites, **2**;(2) 4.0 mM ionophore **Mn-2** and 1.0 mM anionic sites, **2** at (A) pH=6.20 and (B) pH=3.50.

## **References**

1. Behringer, C.; Lehmann, B.; Haug, J.-P.; Seiler, K.; Morf, W. E.; Hartman, K.; Simon, W. *Anal. Chim. Acta* **1990**, 233.
2. Bakker, E.; Pretsch, E. *J. Electrochem. Soc.* **1997**, 144, L125.
3. Bakker, E.; Pretsch, E. *Anal. Chem.* **1998**, 70, 295.
4. Ceresa, A.; Pretsch, E. *Anal. Chim. Acta.* **1999**, 395, 41.
5. Boswell, P. G.; Szijjarto, C.; Jurisch, M.; Gladysz, J. A.; Rabai, J. *Anal. Chem.* **2008**, 80, 2084-2090.
6. Lai, C.-Z.; Reardon, M. E.; Boswell, P. G.; Bühlmann, P. *J. Fluor. Chem.* **2010**, 131, 42-46.
7. Bühlmann, P.; Pretsch, E.; Bakker, E. *Chem. Rev.* **1998**, 98, 1593-1687.
